# Supplementary material for: Susceptibility of Faba Bean (Vicia faba L.) to Heat Stress During Floral Development and Anthesis
Source: PubMed Central journal article supplement (PMC5763371; doi:10.1111/jac.12172), 2016-03-21
Supplement: JAC-202-508-s001.pdf [file JAC-202-508-s001.pdf]

## Supplementary Information

**Table S1:** Summary of floral development scores measured on the primary stems of all experimental plants prior to temperature treatments.

| Heat      | No. floral nodes on primary stem with flowers present (stage $\geq 1$ ); mean $\pm$ SD |               |               |               | No. floral nodes on primary stem with flowers open (stage $\geq 7$ ); mean $\pm$ SD |               |               |               |               |
|-----------|----------------------------------------------------------------------------------------|---------------|---------------|---------------|-------------------------------------------------------------------------------------|---------------|---------------|---------------|---------------|
|           | Rep.                                                                                   | 1             | 2             | 3             | 4                                                                                   | 1             | 2             | 3             | 4             |
| <b>18</b> |                                                                                        | 4.5 $\pm$ 2.0 | 5.5 $\pm$ 1.2 | 5.7 $\pm$ 2.1 | 3.6 $\pm$ 2.2                                                                       | 1.4 $\pm$ 1.1 | 0.8 $\pm$ 1.5 | 2.0 $\pm$ 1.2 | 0.4 $\pm$ 0.7 |
| <b>22</b> |                                                                                        | 5.6 $\pm$ 1.5 | 6.6 $\pm$ 1.3 | 6.3 $\pm$ 1.6 | 3.7 $\pm$ 2.5                                                                       | 1.6 $\pm$ 1.2 | 2.2 $\pm$ 1.9 | 2.9 $\pm$ 0.8 | 0.4 $\pm$ 0.9 |
| <b>26</b> |                                                                                        | 6.1 $\pm$ 1.3 | 6.2 $\pm$ 1.6 | 5.6 $\pm$ 1.5 | 4.1 $\pm$ 2.2                                                                       | 2.3 $\pm$ 1.1 | 1.7 $\pm$ 1.6 | 2.3 $\pm$ 1.2 | 0.4 $\pm$ 0.7 |
| <b>30</b> |                                                                                        | 6.2 $\pm$ 1.2 | 5.7 $\pm$ 1.2 | 6.4 $\pm$ 1.2 | 3.8 $\pm$ 1.9                                                                       | 2.2 $\pm$ 1.1 | 1.0 $\pm$ 1.1 | 2.4 $\pm$ 0.8 | 0.5 $\pm$ 0.8 |
| <b>34</b> |                                                                                        | 5.1 $\pm$ 1.0 | 6.5 $\pm$ 1.0 | 6.1 $\pm$ 1.9 | 3.6 $\pm$ 1.9                                                                       | 1.4 $\pm$ 1.1 | 1.9 $\pm$ 1.4 | 2.4 $\pm$ 0.8 | 0.2 $\pm$ 0.4 |

**Table S2:** Summary of pollen germination data from a subset of plants sampled in year one.

| Heat      | Proportion of germination per flower per plant |       |       | Flowers sampled |    |    | No. germinated pollen grains |      |     | No. total pollen grains |      |      |     |
|-----------|------------------------------------------------|-------|-------|-----------------|----|----|------------------------------|------|-----|-------------------------|------|------|-----|
|           | Rep.                                           | 1     | 2     | 3               | 1  | 2  | 3                            | 1    | 2   | 3                       | 1    | 2    | 3   |
| <b>18</b> |                                                | 0.771 | 0.605 | 0.765           | 23 | 24 | 21                           | 1109 | 651 | 661                     | 1355 | 1075 | 863 |
| <b>22</b> |                                                | 0.777 | 0.625 | 0.835           | 32 | 26 | 14                           | 1233 | 694 | 577                     | 1801 | 1355 | 699 |
| <b>26</b> |                                                | 0.680 | 0.541 | 0.887           | 25 | 25 | 19                           | 1272 | 469 | 651                     | 1984 | 1098 | 743 |
| <b>30</b> |                                                | 0.472 | 0.526 | 0.604           | 15 | 19 | 22                           | 321  | 408 | 422                     | 646  | 1152 | 649 |
| <b>34</b> |                                                | 0.079 | 0.071 | 0.089           | 26 | 7  | 3                            | 138  | 25  | 5                       | 1894 | 464  | 99  |
